# Supplementary material
Source: Royal Society of Chemistry journal article supplement (doi:10.1039/d6an00048g)
Supplement: d6an00048g7.pdf [file d6an00048g7.pdf]

## Supplementary

**Table S1.** Instrumental skin parameters (corneometry, softness and elasticity) expressed as mean  $\pm$  standard deviation (SD) and 95% confidence interval (CI) for treatment and placebo groups. Data are reported as changes from baseline ( $\Delta$  T1h–T0). Effect size (Cohen's d) was calculated to assess differences between treatment and placebo.

| <b>Skin parameters</b> | <b>Group</b> | <b><math>\Delta</math> Mean <math>\pm</math> SD</b> | <b>95% CI</b> | <b>Cohen's d vs Placebo</b> |
|------------------------|--------------|-----------------------------------------------------|---------------|-----------------------------|
| Corneometry            | EO-A         | 84.0 $\pm$ 32.5                                     | 68.8 – 99.2   | 3.11                        |
|                        | EO-B         | 89.0 $\pm$ 29.7                                     | 75.1 – 102.9  | 3.76                        |
|                        | Placebo      | 4.8 $\pm$ 15.4                                      | -2.4 – 12.0   | -                           |
| Softness               | EO-A         | 1.5 $\pm$ 0.5                                       | 1.2 – 1.7     | 0.557                       |
|                        | EO-B         | 2.5 $\pm$ 1.2                                       | 1.9 - 3.0     | 0.668                       |
|                        | Placebo      | -3.4 $\pm$ 12.4                                     | -9.3 – 2.4    | -                           |
| Elasticity             | EO-A         | 3.0 $\pm$ 1.1                                       | 2.5 – 2.5     | 0.331                       |
|                        | EO-B         | -2.0 $\pm$ 3.8                                      | -3.8 - -0.2   | 0.0578                      |
|                        | Placebo      | -3.0 $\pm$ 25.7                                     | -15.1 – 9.0   | -                           |
