# Supplementary material
Source: Royal Society of Chemistry journal article supplement (doi:10.1039/d6an00048g)

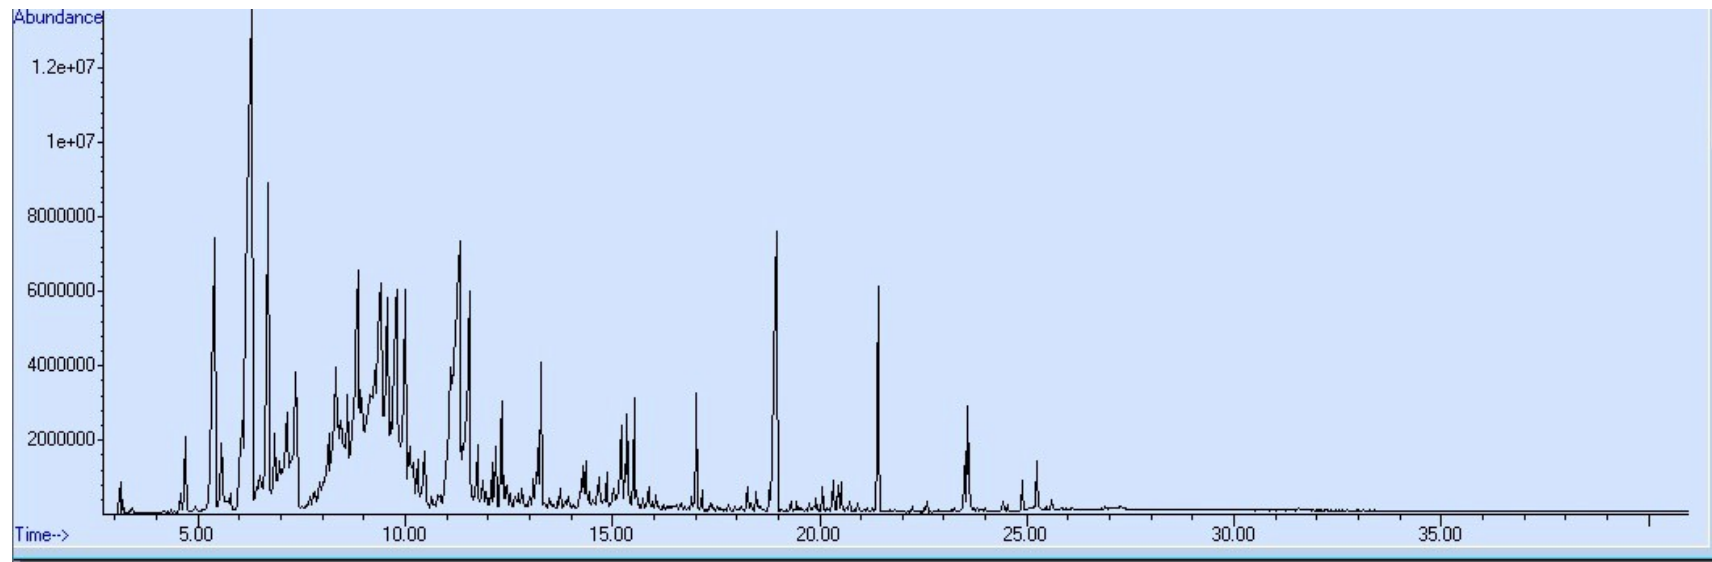

Supplement: d6an00048g1.pdf [file d6an00048g1.pdf]

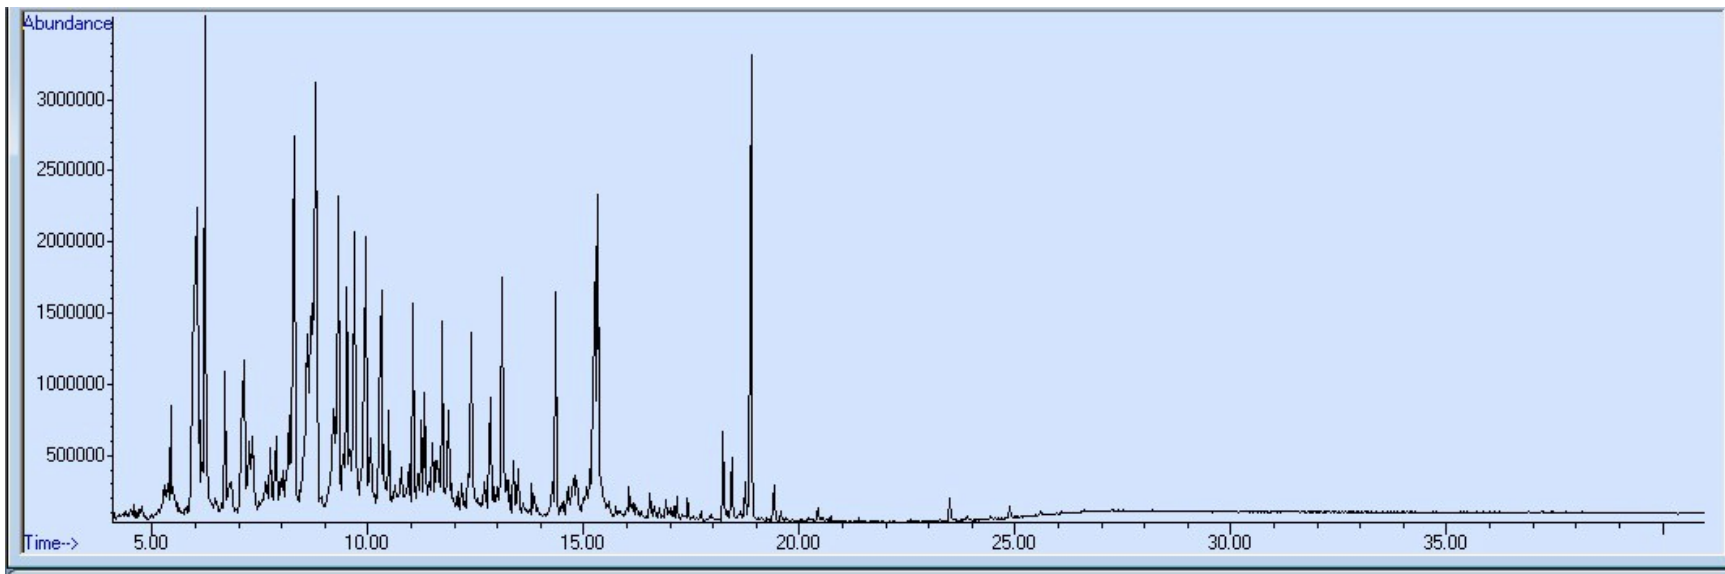

Supplement: d6an00048g2.pdf [file d6an00048g2.pdf]

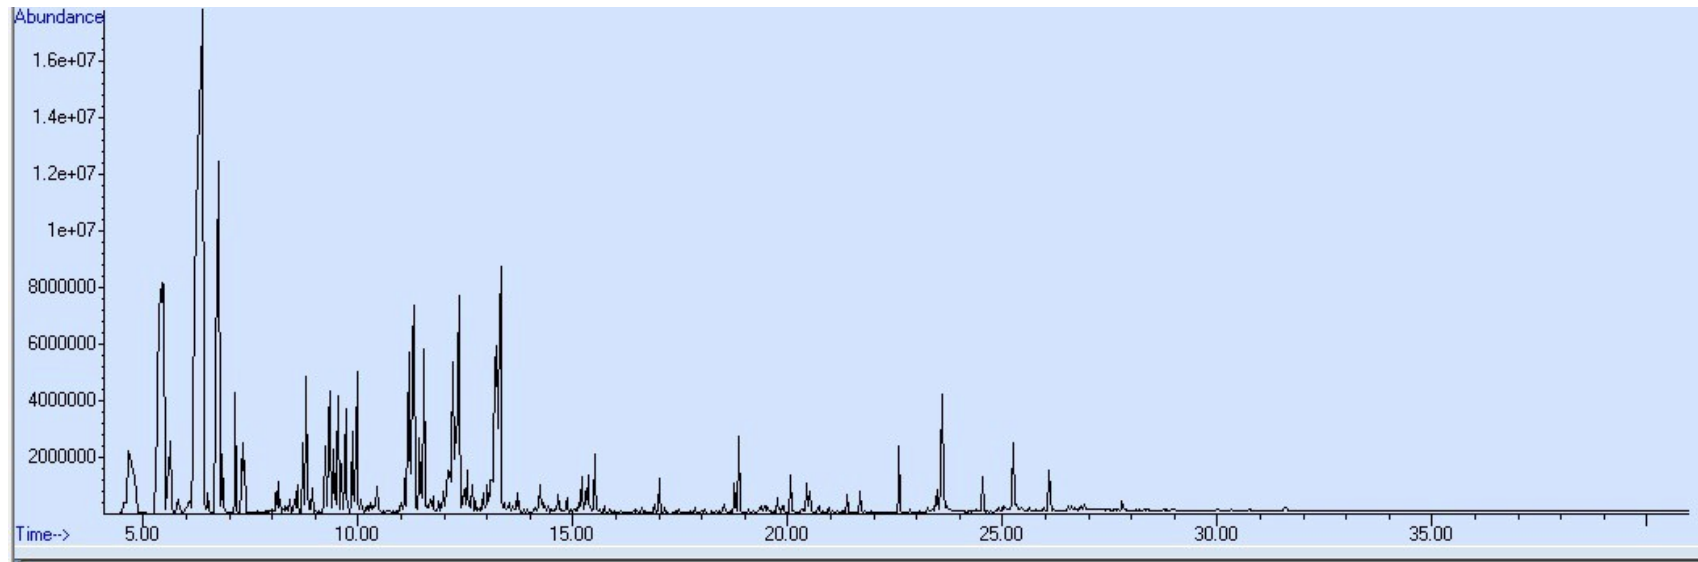

Supplement: d6an00048g3.pdf [file d6an00048g3.pdf]

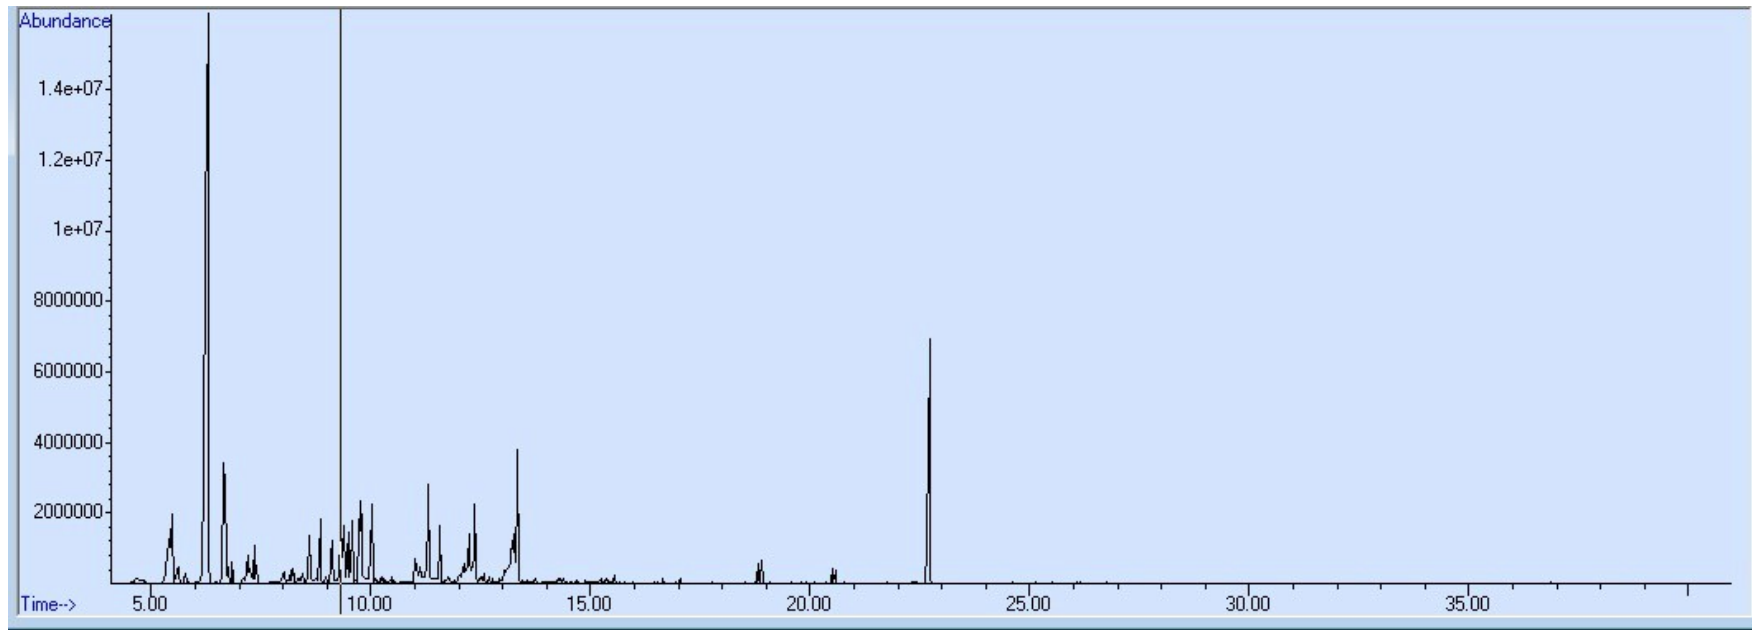

Supplement: d6an00048g4.pdf [file d6an00048g4.pdf]

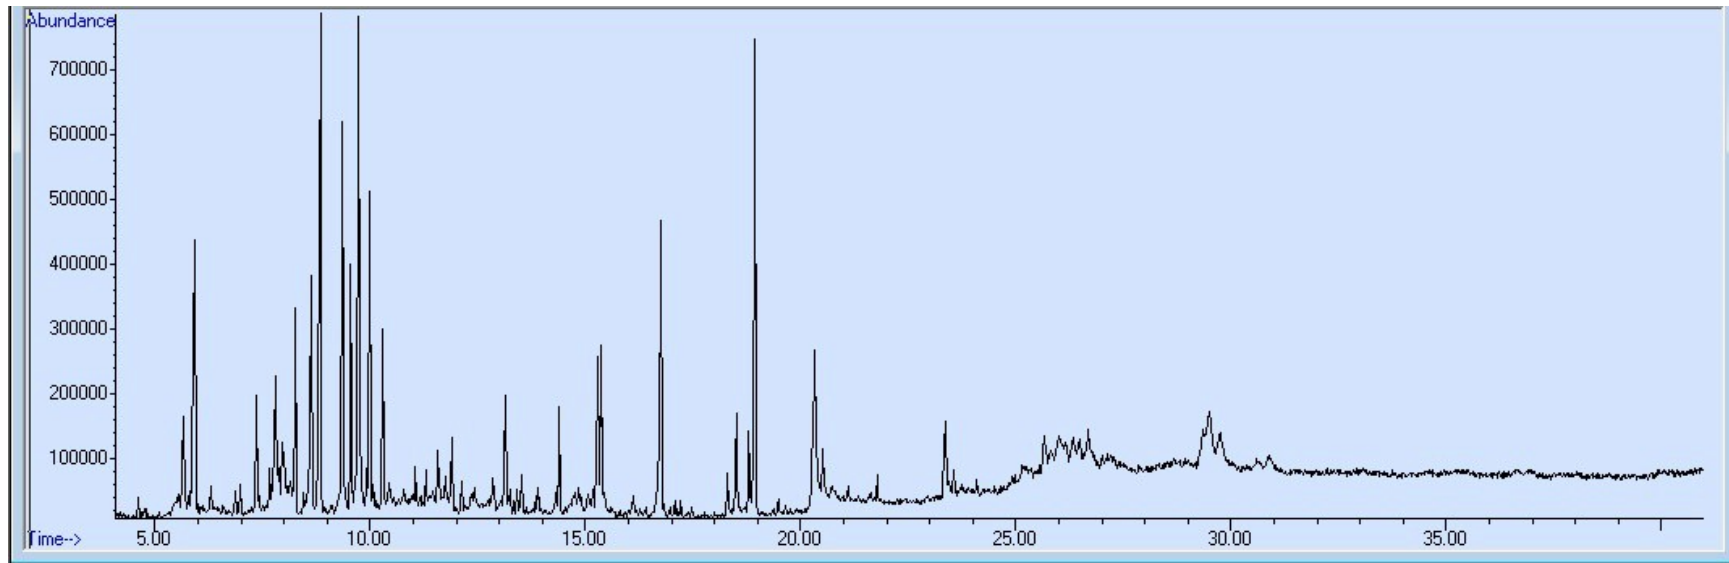

Supplement: d6an00048g5.pdf [file d6an00048g5.pdf]

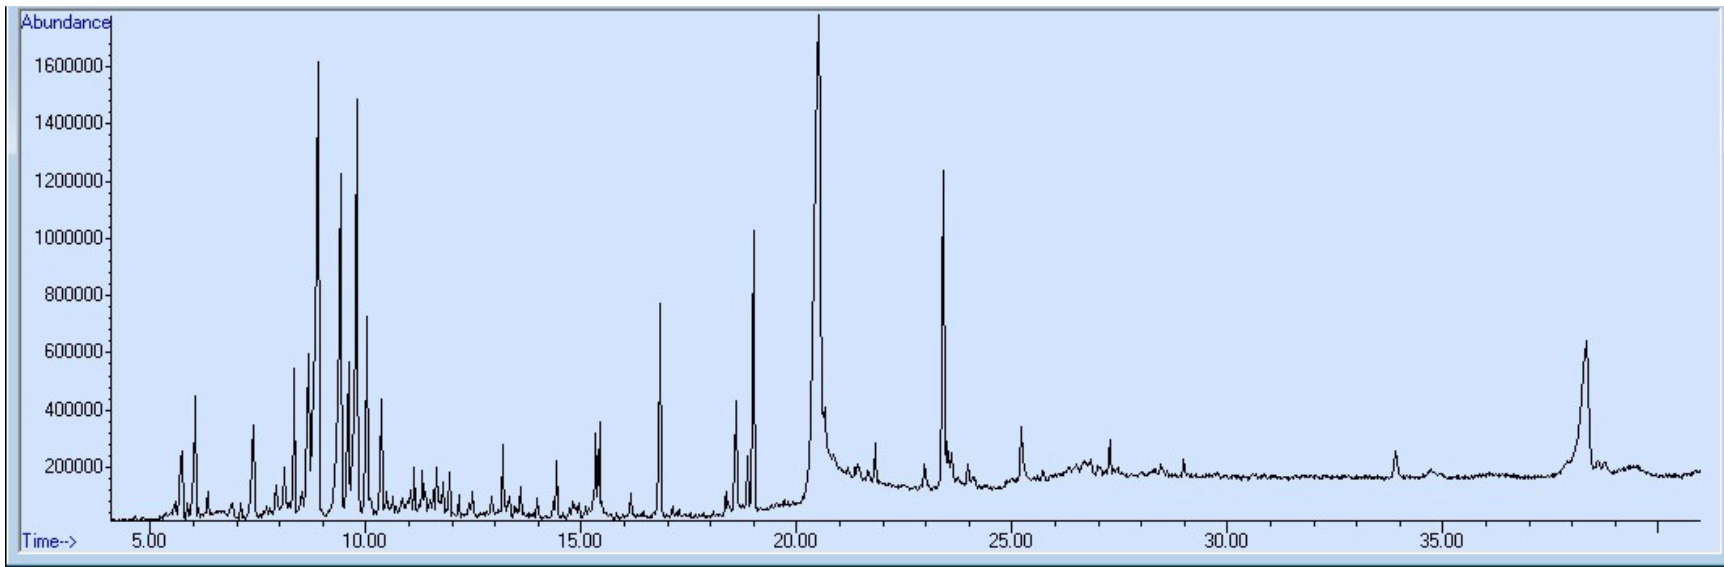

Supplement: d6an00048g6.pdf [file d6an00048g6.pdf]
